# Supplementary material for: Investigation of the influence of natural deep eutectic solvents (NaDES) in the properties of chitosan-stabilised films
Source: Royal Society of Chemistry journal article supplement (doi:10.1039/d0ma01008a), 2021-01-01
Supplement: d0ma01008a1.pdf [file d0ma01008a1.pdf]

## Supplementary Information

### **Investigation of the influence of Natural Deep Eutectic Solvents (NaDES) in the properties of chitosan-stabilised films.**

Antonella Rozaria Nefeli Pontillo<sup>a</sup>, Spyridon Koutsoukos<sup>b</sup>, Tom Welton<sup>b</sup> and Anastasia Detsi<sup>\*a</sup>

<sup>1</sup> Laboratory of Organic Chemistry, Department of Chemical Sciences, School of Chemical Engineering, National Technical University of Athens, Zografou, Greece

<sup>2</sup> Department of Chemistry, Molecular Sciences Research Hub, Imperial College London, White City Campus, London W12 0BZ, UK.

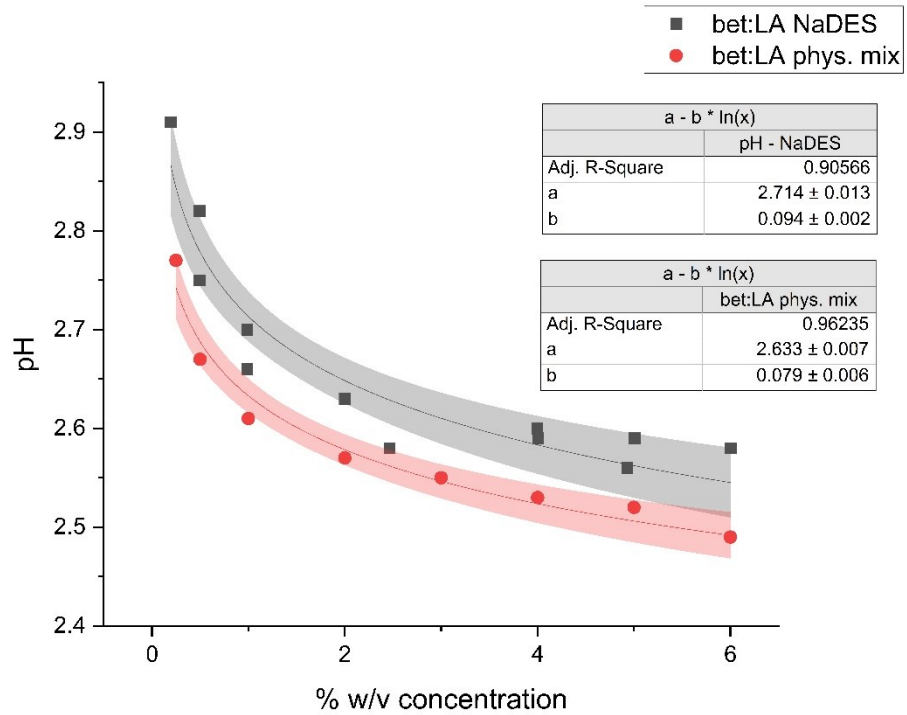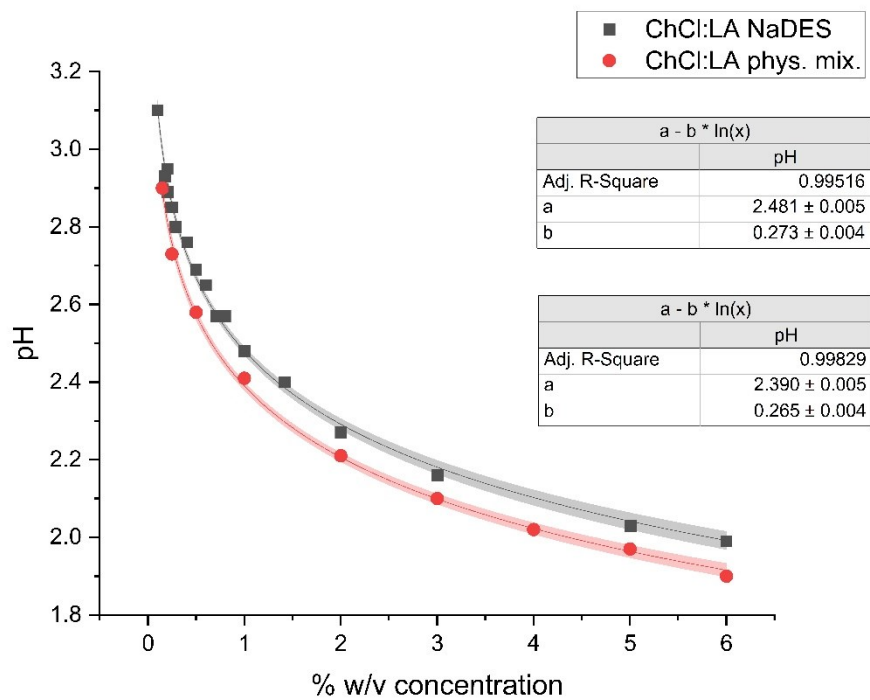

Figure S1. Curve of pH Vs concentration of the bet:LA NaDES and physical mixture (top) and the ChCl:LA NaDES and physical mixture (bottom).

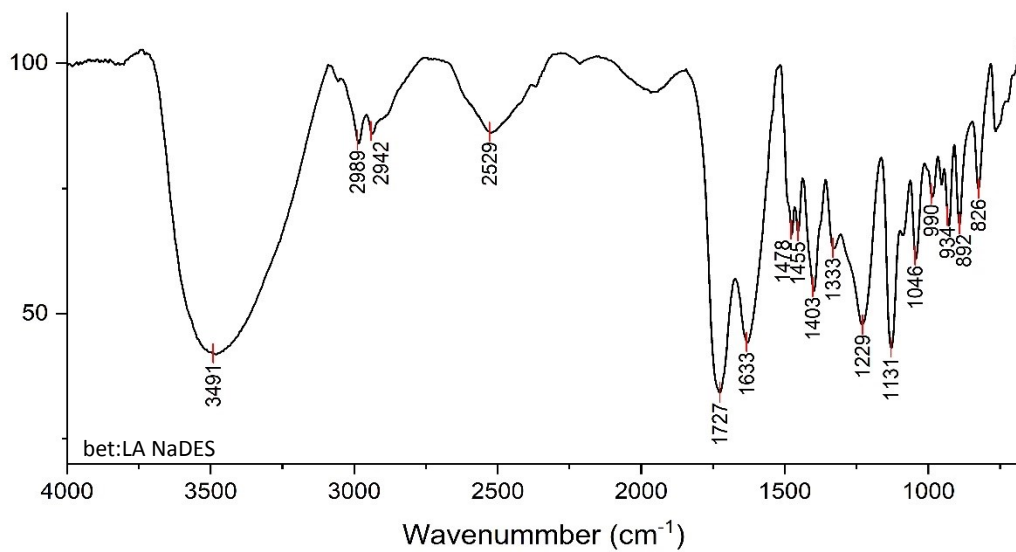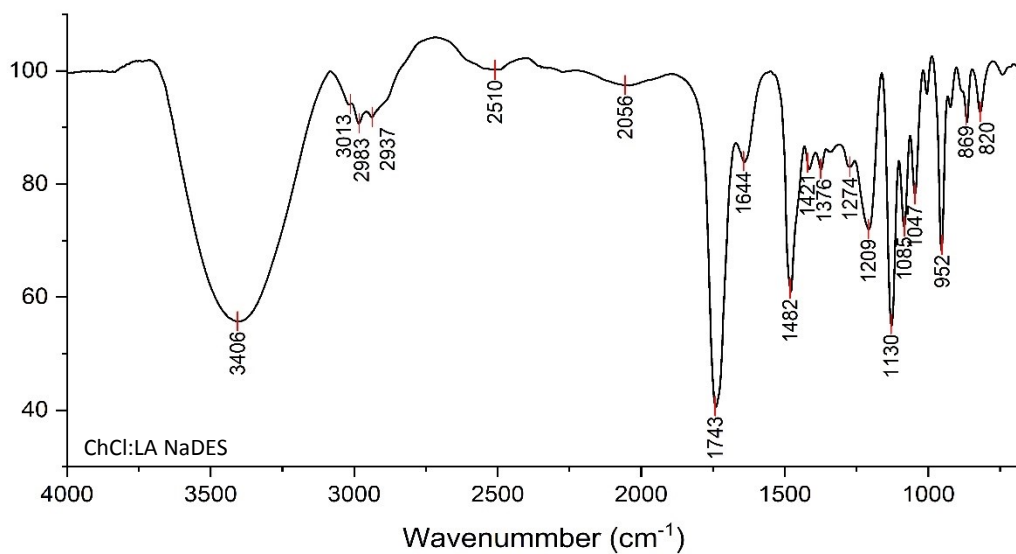

Figure S2. FT-IR spectra of the bet:LA NaDES (top) and the ChCl:LA NaDES (bottom).

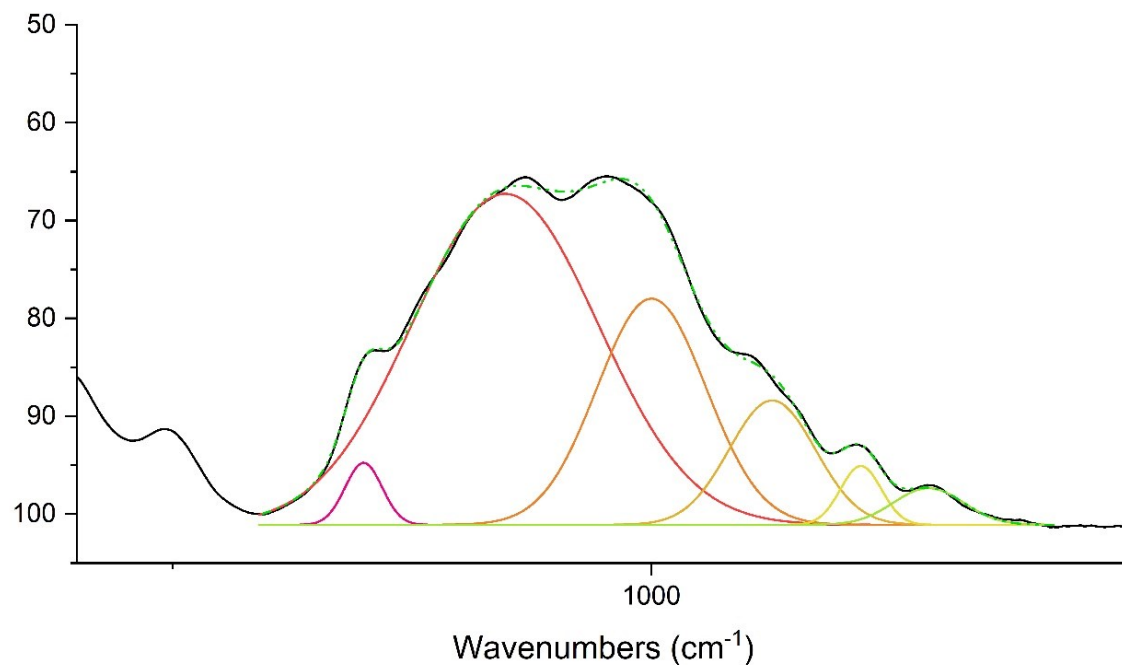

Figure S3. Deconvolution of 1200-840  $\text{cm}^{-1}$  range for F/AA.

Table S1. Accuracy of deconvolution model for F/AA.

| Model         | Gauss                                                                                                                      |                  |                 |                 |                |                 |
|---------------|----------------------------------------------------------------------------------------------------------------------------|------------------|-----------------|-----------------|----------------|-----------------|
| Equation      | $y = y_0 + \left( \frac{A}{w * \sqrt{\frac{\pi}{2}}} \right) * e^{\left( -2 * \left( \frac{x - x_c}{w} \right)^2 \right)}$ |                  |                 |                 |                |                 |
|               | Peak 1                                                                                                                     | Peak 2           | Peak 3          | Peak 4          | Peak 5         | Peak 6          |
| $y_0$         | $101.1 \pm 0.1$                                                                                                            |                  |                 |                 |                |                 |
| $x_c$         | $1150.2 \pm 0.1$                                                                                                           | $1076.4 \pm 0.3$ | $999.9 \pm 0.2$ | $936.8 \pm 0.3$ | $890 \pm 0.2$  | $855.2 \pm 0.6$ |
| W             | $19.3 \pm 0.2$                                                                                                             | $97.2 \pm 0.5$   | $57.0 \pm 0.5$  | $45.1 \pm 0.6$  | $21.4 \pm 0.5$ | $36.6 \pm 1.1$  |
| A             | $-153 \pm 3$                                                                                                               | $-4122 \pm 31$   | $-1650 \pm 32$  | $-719 \pm 15$   | $-161 \pm 6$   | $-172 \pm 6$    |
| R-Square      | 0.99929                                                                                                                    |                  |                 |                 |                |                 |
| Adj. R-Square | 0.99928                                                                                                                    |                  |                 |                 |                |                 |

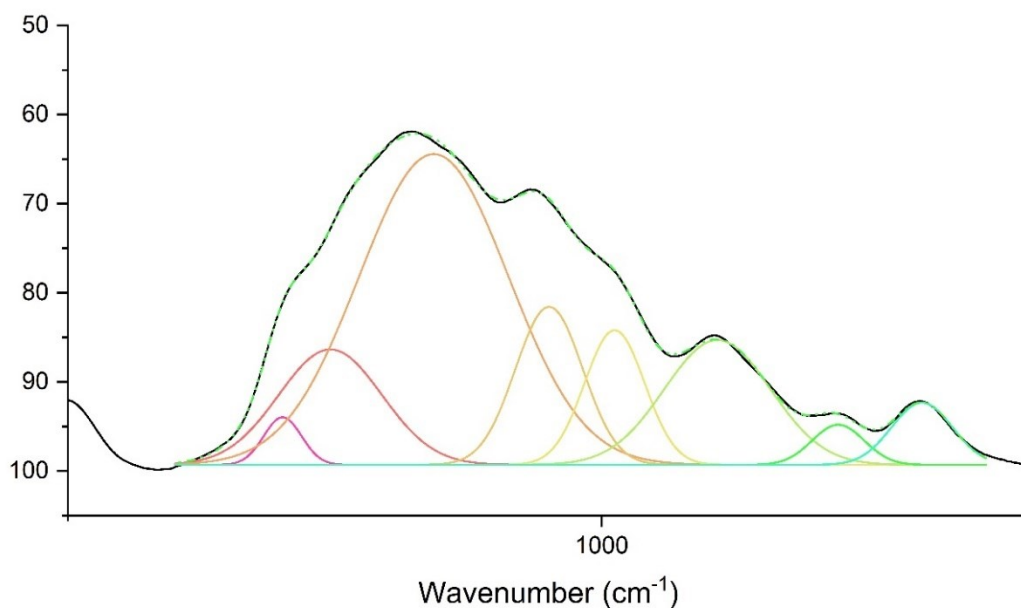

Figure S4. Deconvolution of 1200-840  $\text{cm}^{-1}$  range for F/Tween.

Table S2. Accuracy of deconvolution model for F/Tween.

| Model         | Gauss                                                                                                                      |                |                 |                  |                |                 |                 |                 |
|---------------|----------------------------------------------------------------------------------------------------------------------------|----------------|-----------------|------------------|----------------|-----------------|-----------------|-----------------|
| Equation      | $y = y_0 + \left( \frac{A}{w * \sqrt{\frac{\pi}{2}}} \right) * e^{\left( -2 * \left( \frac{x - x_c}{w} \right)^2 \right)}$ |                |                 |                  |                |                 |                 |                 |
|               | Peak 1                                                                                                                     | Peak 2         | Peak 3          | Peak 4           | Peak 5         | Peak 6          | Peak 7          | Peak 8          |
| $y_0$         | $99.31 \pm 0.05$                                                                                                           |                |                 |                  |                |                 |                 |                 |
| $x_c$         | $1149.4 \pm 0.1$                                                                                                           | $1127 \pm 2$   | $1079 \pm 2$    | $1024.7 \pm 0.3$ | $994 \pm 0.3$  | $945.9 \pm 0.2$ | $889.3 \pm 0.2$ | $850.1 \pm 0.1$ |
| W             | $17.7 \pm 0.2$                                                                                                             | $48.3 \pm 2.6$ | $69.9 \pm 5.6$  | $31.6 \pm 0.8$   | $28.2 \pm 0.4$ | $49.8 \pm 0.4$  | $24.5 \pm 0.4$  | $28.4 \pm 0.3$  |
| A             | $-118 \pm 3$                                                                                                               | $-784 \pm 27$  | $-3056 \pm 349$ | $-702 \pm 65$    | $-534 \pm 16$  | $-874 \pm 8$    | $-138 \pm 3$    | $-249 \pm 4$    |
| R-Square      | $0.99974$                                                                                                                  |                |                 |                  |                |                 |                 |                 |
| Adj. R-Square | $0.99974$                                                                                                                  |                |                 |                  |                |                 |                 |                 |

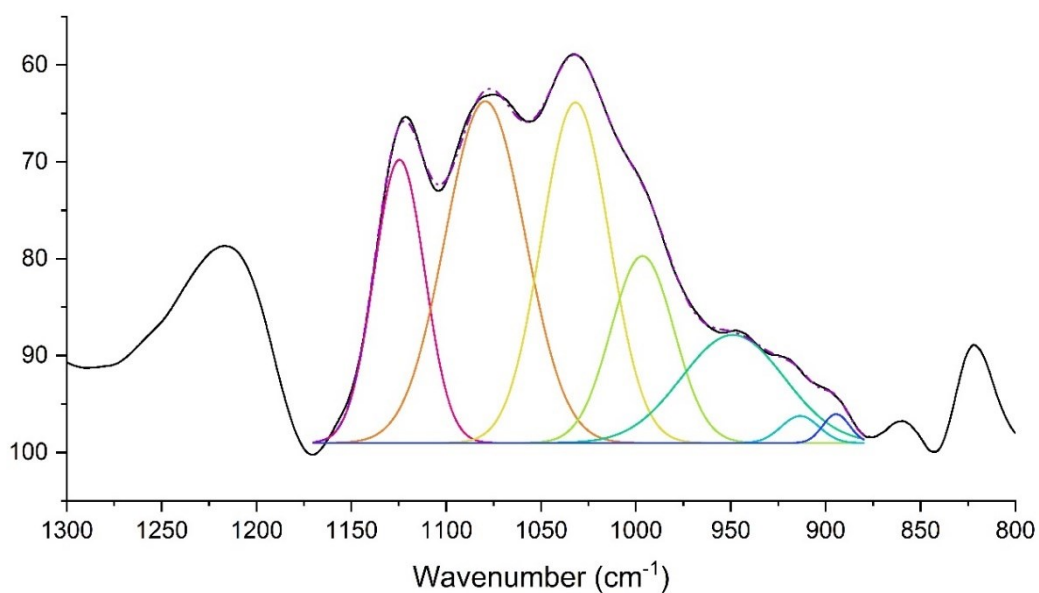

Figure S5. Deconvolution of 1200-840  $\text{cm}^{-1}$  range for F/0.5LA.

Table S3. Accuracy of deconvolution model for F/0.5LA.

| Model         | Gauss                                                                                                       |                  |                  |                 |                |                 |                 |
|---------------|-------------------------------------------------------------------------------------------------------------|------------------|------------------|-----------------|----------------|-----------------|-----------------|
| Equation      | $y = y_0 + \left( \frac{A}{w * \sqrt{\frac{\pi}{2}}} \right) * e^{-2 * \left( \frac{x - x_c}{w} \right)^2}$ |                  |                  |                 |                |                 |                 |
|               | Peak 1                                                                                                      | Peak 2           | Peak 3           | Peak 4          | Peak 5         | Peak 6          | Peak 7          |
| $y_0$         | $99.0 \pm 0.1$                                                                                              |                  |                  |                 |                |                 |                 |
| $x_c$         | $1124.7 \pm 0.1$                                                                                            | $1079.4 \pm 0.3$ | $1031.4 \pm 0.4$ | $996.6 \pm 0.6$ | $948 \pm 1$    | $913.5 \pm 0.8$ | $894.5 \pm 0.6$ |
| W             | $26.6 \pm 0.1$                                                                                              | $42.2 \pm 0.6$   | $35.7 \pm 0.9$   | $33.3 \pm 1.2$  | $54.2 \pm 4.5$ | $19.8 \pm 2$    | $14.1 \pm 1$    |
| A             | $-975 \pm 10$                                                                                               | $-1865 \pm 36$   | $-1574 \pm 77$   | $-805 \pm 87$   | $-758 \pm 69$  | $-70 \pm 19$    | $-52.9 \pm 8.9$ |
| R-Square      | 0.99939                                                                                                     |                  |                  |                 |                |                 |                 |
| Adj. R-Square | 0.99938                                                                                                     |                  |                  |                 |                |                 |                 |

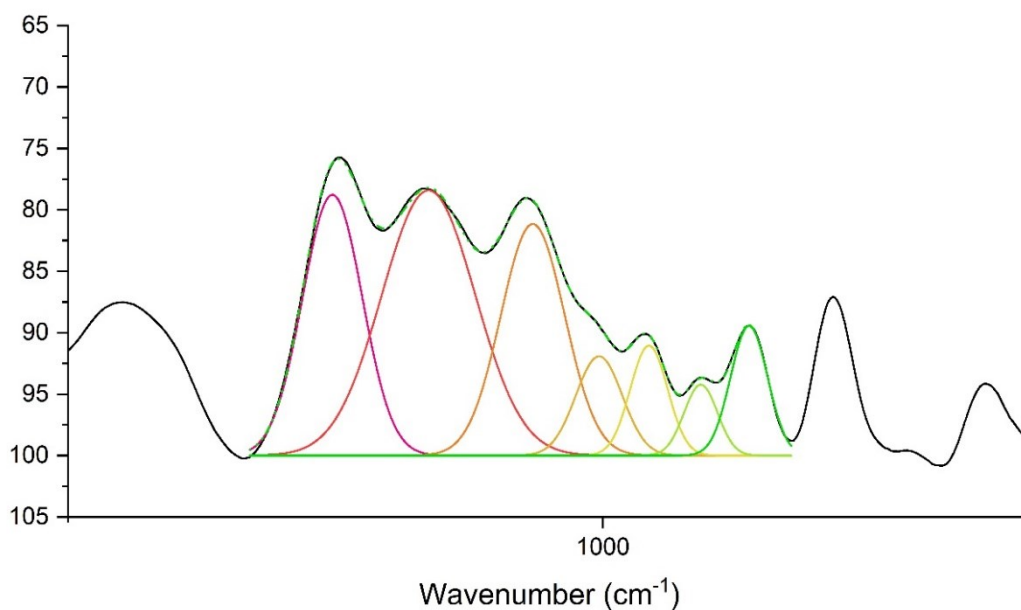

Figure S6. Deconvolution of 1200-920  $\text{cm}^{-1}$  range for F/bet:LA.

Table S4. Accuracy of deconvolution model for F/bet:LA.

| Model         | Gauss                                                                                                                      |                  |                  |                  |                 |                 |                 |
|---------------|----------------------------------------------------------------------------------------------------------------------------|------------------|------------------|------------------|-----------------|-----------------|-----------------|
| Equation      | $y = y_0 + \left( \frac{A}{w * \sqrt{\frac{\pi}{2}}} \right) * e^{\left( -2 * \left( \frac{x - x_c}{w} \right)^2 \right)}$ |                  |                  |                  |                 |                 |                 |
|               | Peak 1                                                                                                                     | Peak 2           | Peak 3           | Peak 4           | Peak 5          | Peak 6          | Peak 7          |
| $y_0$         | $100 \pm 0$                                                                                                                |                  |                  |                  |                 |                 |                 |
| $x_c$         | $1126.4 \pm 0.1$                                                                                                           | $1081.5 \pm 0.1$ | $1032.8 \pm 0.1$ | $1001.8 \pm 0.1$ | $978.5 \pm 0.1$ | $954.3 \pm 0.1$ | $931.7 \pm 0.1$ |
| W             | $27.9 \pm 0.1$                                                                                                             | $43.7 \pm 0.3$   | $29.9 \pm 0.3$   | $21.8 \pm 0.5$   | $17.5 \pm 0.3$  | $15.6 \pm 0.3$  | $17.3 \pm 0.1$  |
| A             | $-743 \pm 4$                                                                                                               | $-1181 \pm 8$    | $-706 \pm 9$     | $-220 \pm 8$     | $-196 \pm 5$    | $-113 \pm 2$    | $-229.1 \pm 1$  |
| R-Square      | 0.99959                                                                                                                    |                  |                  |                  |                 |                 |                 |
| Adj. R-Square | 0.99959                                                                                                                    |                  |                  |                  |                 |                 |                 |

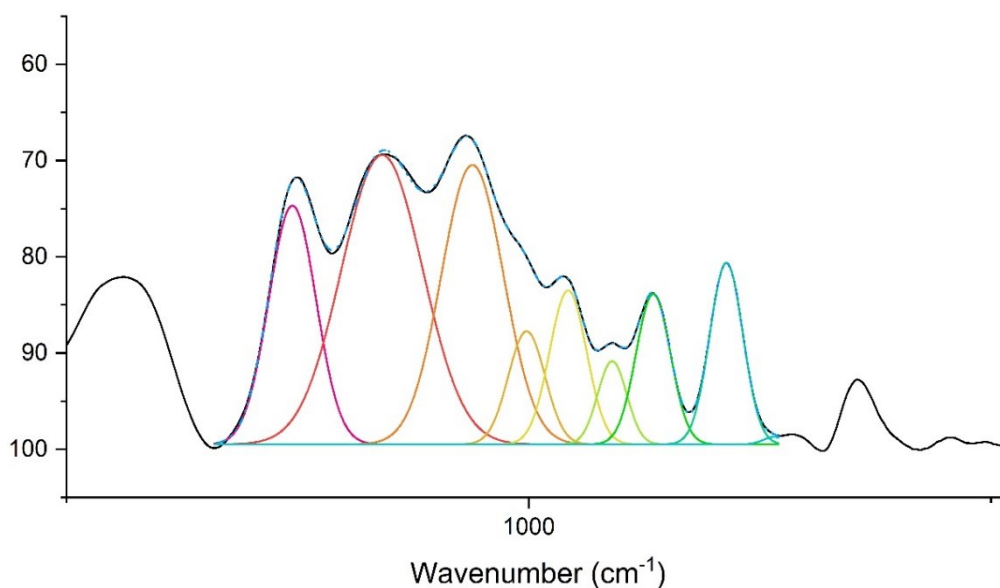

Figure S7. Deconvolution of 1200-840  $\text{cm}^{-1}$  range for F/bet:LA mix.

Table S5. Accuracy of deconvolution model for F/bet:LA phys. mix.

| Model         | Gauss                                                                                                                      |                  |                  |                  |                 |                 |                 |                 |
|---------------|----------------------------------------------------------------------------------------------------------------------------|------------------|------------------|------------------|-----------------|-----------------|-----------------|-----------------|
| Equation      | $y = y_0 + \left( \frac{A}{w * \frac{\pi}{\sqrt{2}}} \right) * e^{\left( -2 * \left( \frac{x - x_c}{w} \right)^2 \right)}$ |                  |                  |                  |                 |                 |                 |                 |
|               | Peak 1                                                                                                                     | Peak 2           | Peak 3           | Peak 4           | Peak 5          | Peak 6          | Peak 7          | Peak 8          |
| $y_0$         | $100 \pm 0$                                                                                                                |                  |                  |                  |                 |                 |                 |                 |
| $x_c$         | $1127.7 \pm 0.0$                                                                                                           | $1079.3 \pm 0.1$ | $1030.5 \pm 0.1$ | $1001.1 \pm 0.2$ | $978.7 \pm 0.2$ | $954.9 \pm 0.1$ | $932.7 \pm 0.1$ | $893.1 \pm 0.1$ |
| w             | $25.6 \pm 0.1$                                                                                                             | $43.9 \pm 0.3$   | $33.7 \pm 0.3$   | $19.8 \pm 0.5$   | $20.0 \pm 0.4$  | $15.7 \pm 0.3$  | $18.6 \pm 0.1$  | $17.9 \pm 0.1$  |
| A             | $-762 \pm 4$                                                                                                               | $-1654 \pm 10$   | $-1125 \pm 15$   | $-292 \pm 14$    | $-401 \pm 12$   | $-170 \pm 5$    | $-364 \pm 3$    | $-424 \pm 1$    |
| R-Square      | 0.99971                                                                                                                    |                  |                  |                  |                 |                 |                 |                 |
| Adj. R-Square | 0.99971                                                                                                                    |                  |                  |                  |                 |                 |                 |                 |



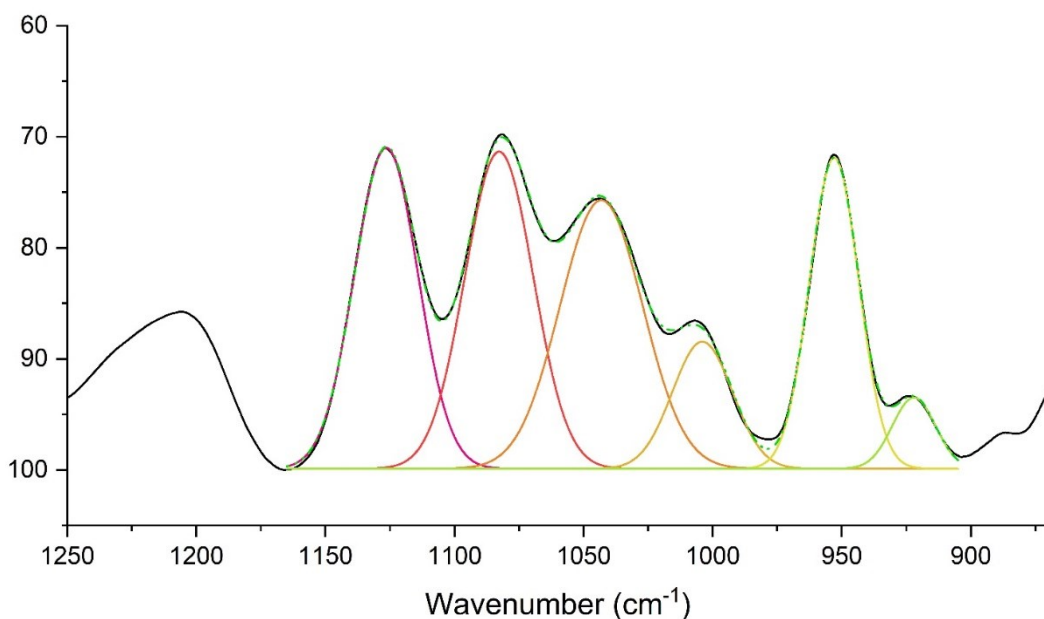

Figure S8. Deconvolution of 1200-840  $\text{cm}^{-1}$  range for F/ChCl:LA.

Table S6. Accuracy of deconvolution model for F/ChCl:LA .

| Model         | Gauss                                                                                                                      |                  |                  |                  |                 |                 |
|---------------|----------------------------------------------------------------------------------------------------------------------------|------------------|------------------|------------------|-----------------|-----------------|
| Equation      | $y = y_0 + \left( \frac{A}{w * \sqrt{\frac{\pi}{2}}} \right) * e^{\left( -2 * \left( \frac{x - x_c}{w} \right)^2 \right)}$ |                  |                  |                  |                 |                 |
|               | Peak 1                                                                                                                     | Peak 2           | Peak 3           | Peak 4           | Peak 5          | Peak 6          |
| $y_0$         | $100 \pm 0$                                                                                                                |                  |                  |                  |                 |                 |
| $x_c$         | $1126.5 \pm 0.0$                                                                                                           | $1082.8 \pm 0.1$ | $1043.2 \pm 0.0$ | $1004.0 \pm 0.0$ | $952.9 \pm 0.0$ | $922.1 \pm 0.1$ |
| $w$           | $24.6 \pm 0.1$                                                                                                             | $26.5 \pm 0.1$   | $32.1 \pm 0.2$   | $23.2 \pm 0.2$   | $19.1 \pm 0.0$  | $16.6 \pm 0.2$  |
| $A$           | $-891 \pm 3$                                                                                                               | $-948 \pm 5$     | $-972 \pm 7$     | $-333 \pm 4$     | $-669 \pm 2$    | $-134 \pm 2$    |
| R-Square      | 0.99921                                                                                                                    |                  |                  |                  |                 |                 |
| Adj. R-Square | 0.99920                                                                                                                    |                  |                  |                  |                 |                 |

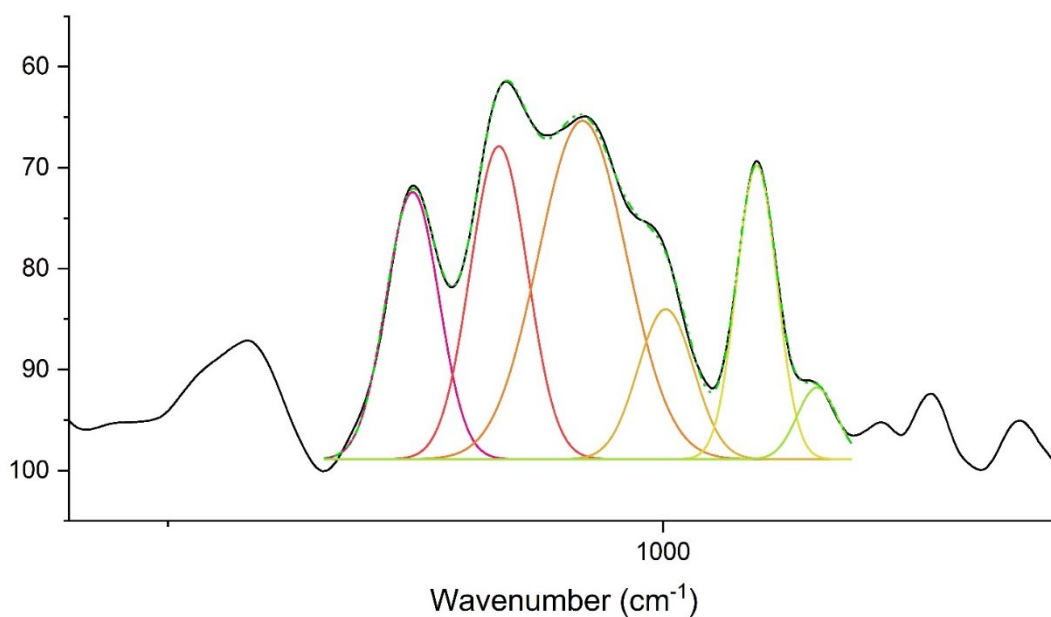

Figure S9. Deconvolution of 1200-840  $\text{cm}^{-1}$  range for F/ChCl:LA mix.

Table S7. Accuracy of deconvolution model for F/ChCl:LA mix.

| Model         | Gauss                                                                                                                      |                  |                  |                 |                 |                 |
|---------------|----------------------------------------------------------------------------------------------------------------------------|------------------|------------------|-----------------|-----------------|-----------------|
| Equation      | $y = y_0 + \left( \frac{A}{w * \sqrt{\frac{\pi}{2}}} \right) * e^{\left( -2 * \left( \frac{x - x_c}{w} \right)^2 \right)}$ |                  |                  |                 |                 |                 |
|               | Peak 1                                                                                                                     | Peak 2           | Peak 3           | Peak 4          | Peak 5          | Peak 6          |
| $y_0$         | $98.9 \pm 0$                                                                                                               |                  |                  |                 |                 |                 |
| $x_c$         | $1126.5 \pm 0.0$                                                                                                           | $1082.8 \pm 0.1$ | $1040.7 \pm 0.1$ | $998.6 \pm 0.3$ | $952.7 \pm 0.0$ | $922.2 \pm 0.1$ |
| $w$           | $26.6 \pm 0.1$                                                                                                             | $28.9 \pm 0.2$   | $44.4 \pm 0.9$   | $28.0 \pm 0.3$  | $20.4 \pm 0.1$  | $20.1 \pm 0.3$  |
| $A$           | $-883 \pm 5$                                                                                                               | $-1123 \pm 23$   | $-1865 \pm 39$   | $-522 \pm 19$   | $-744 \pm 3$    | $-179 \pm 3$    |
| R-Square      | 0.99905                                                                                                                    |                  |                  |                 |                 |                 |
| Adj. R-Square | 0.99903                                                                                                                    |                  |                  |                 |                 |                 |

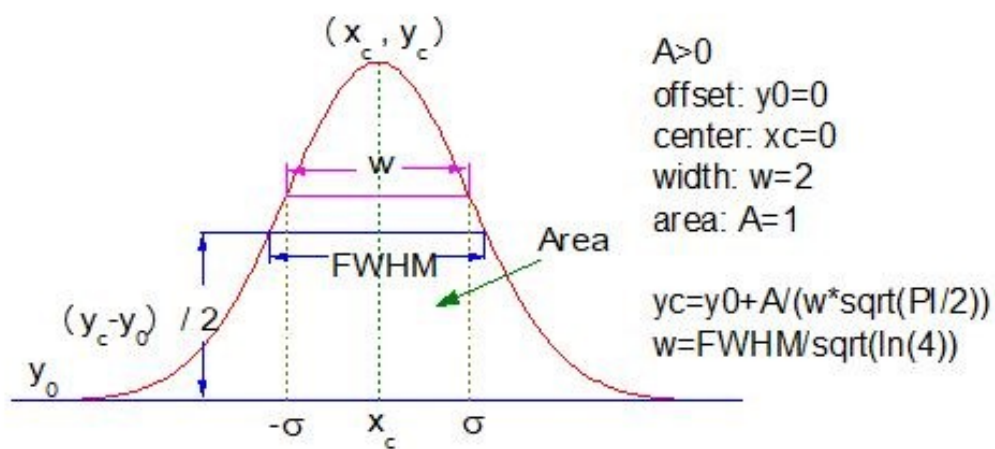

Figure S10. Gauss Curve equation parameters explanation.

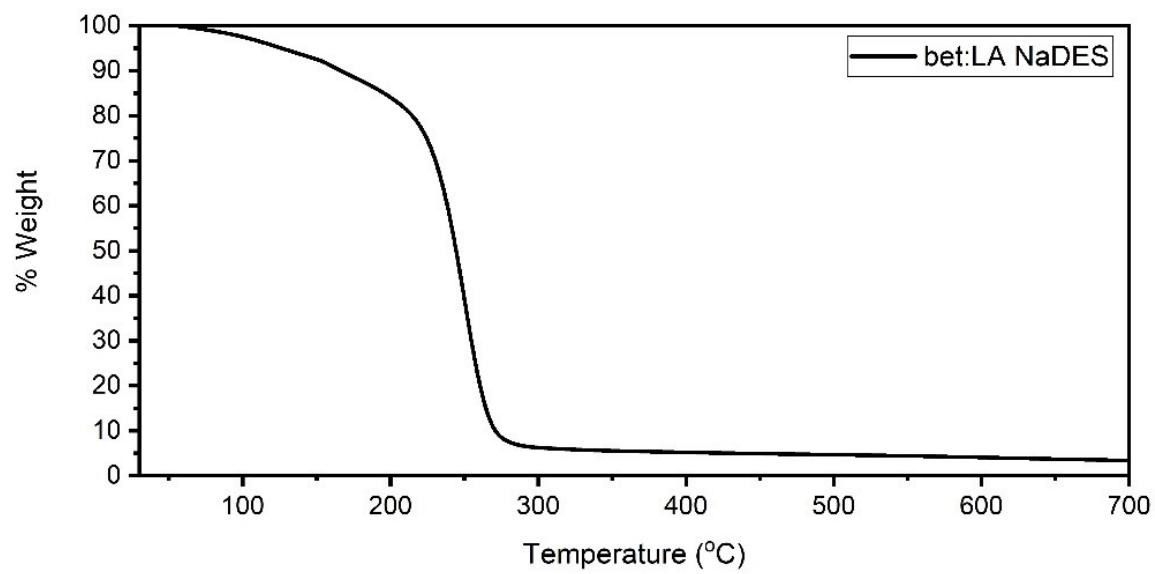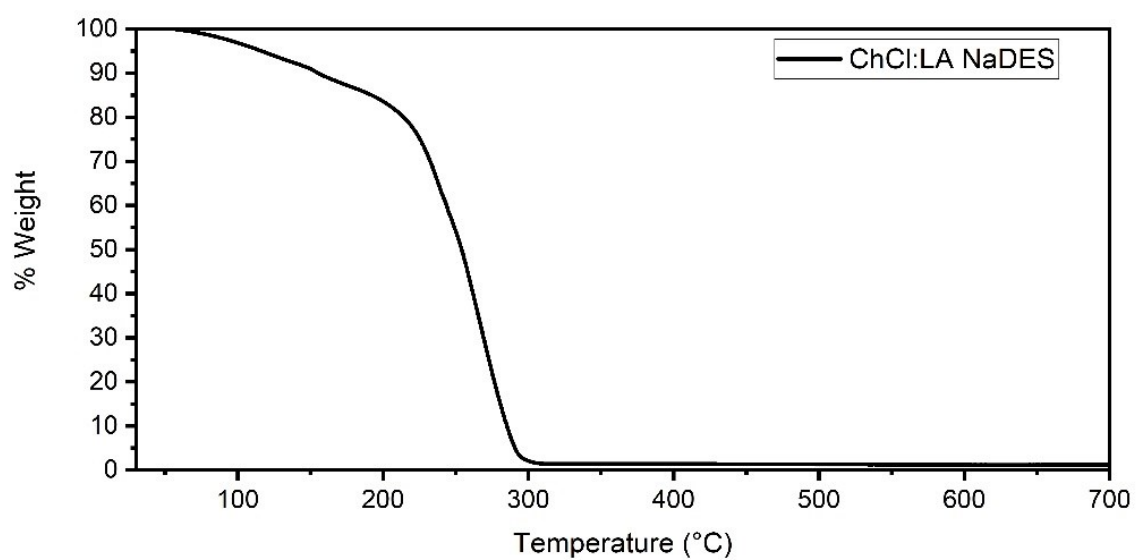

Figure S11. TGA graphs of the bet:LA NaDES (top) and the ChCl:LA NaDES (down).

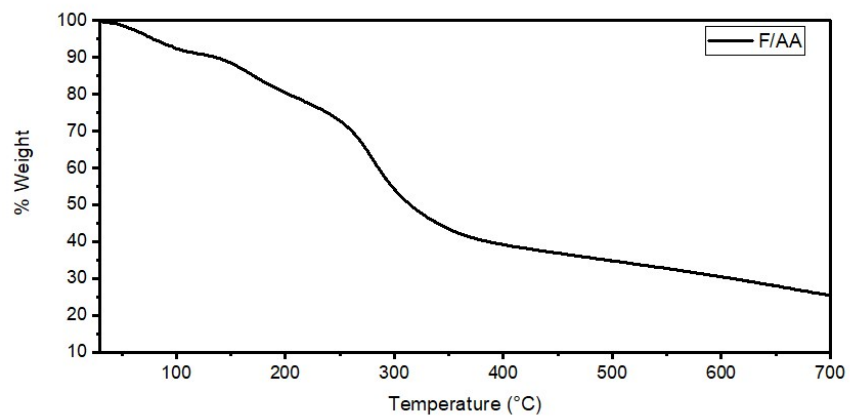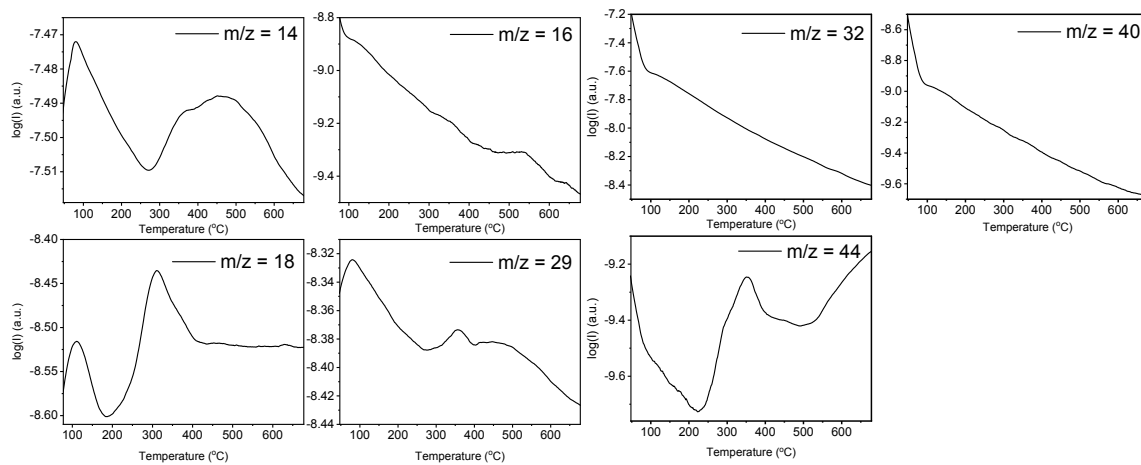

Figure S12. TGA-MS of F/AA.

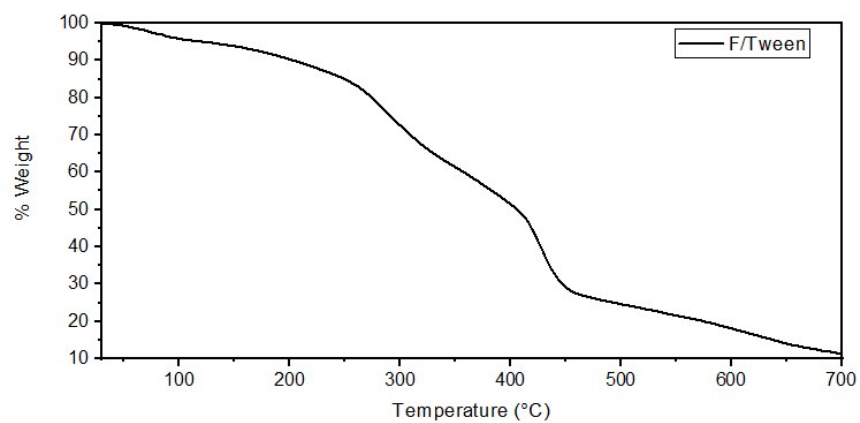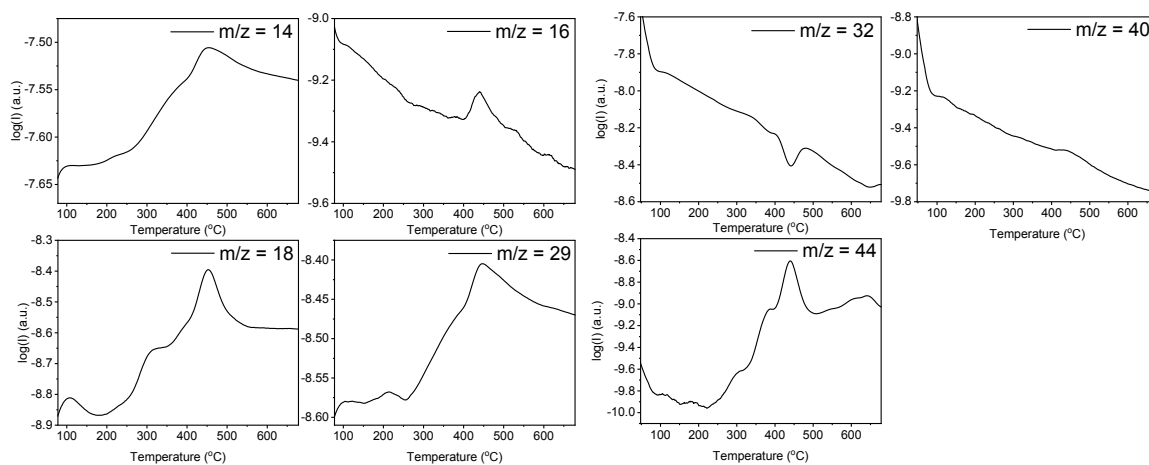

Figure S13. TGA-MS of F/Tween.

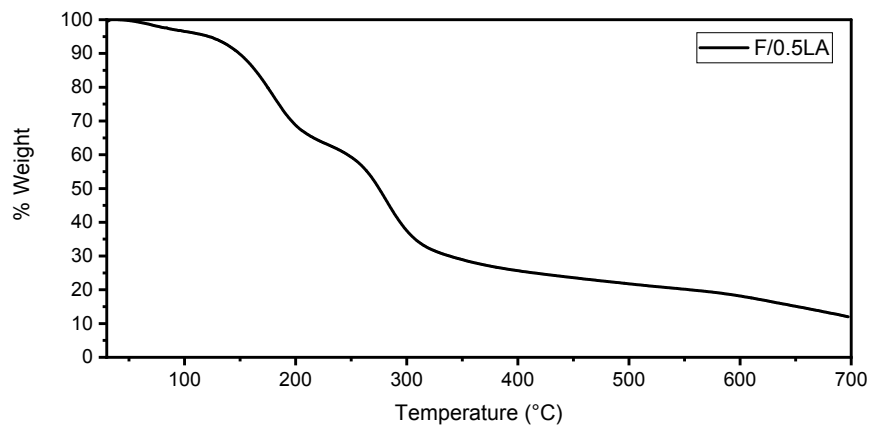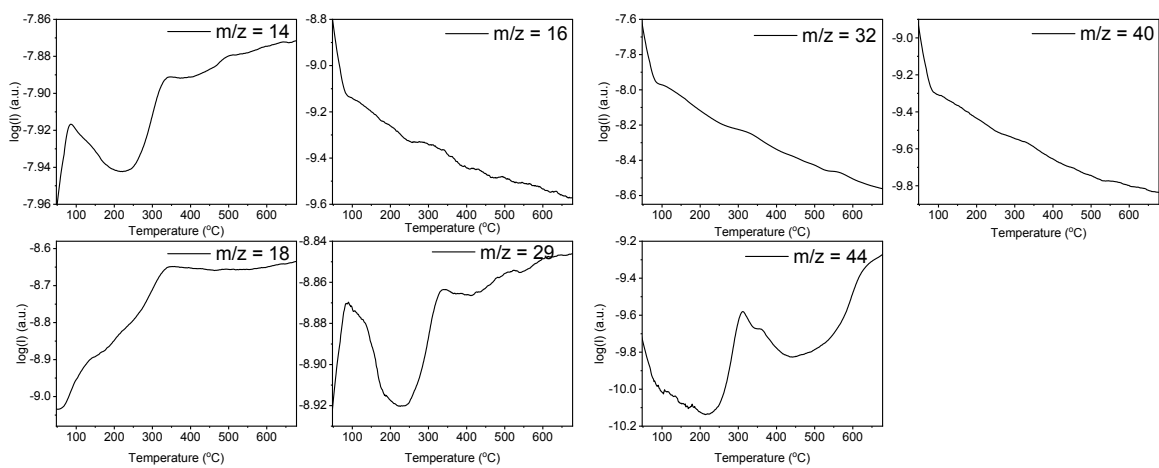

Figure S14. TGA-MS of F/0.5LA

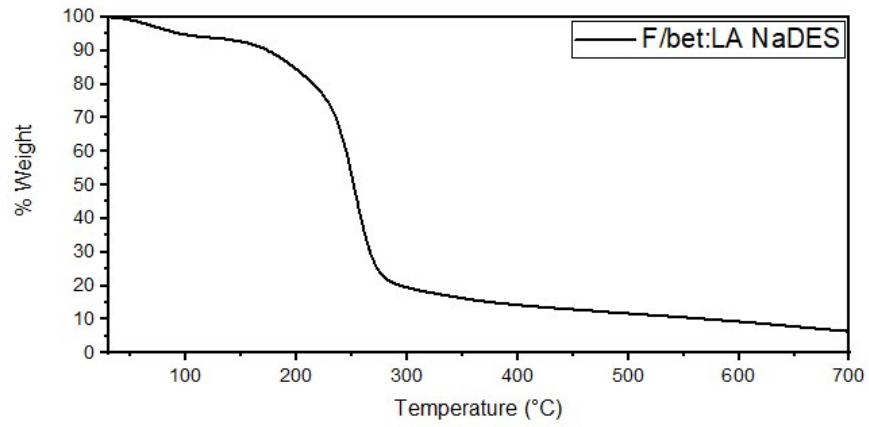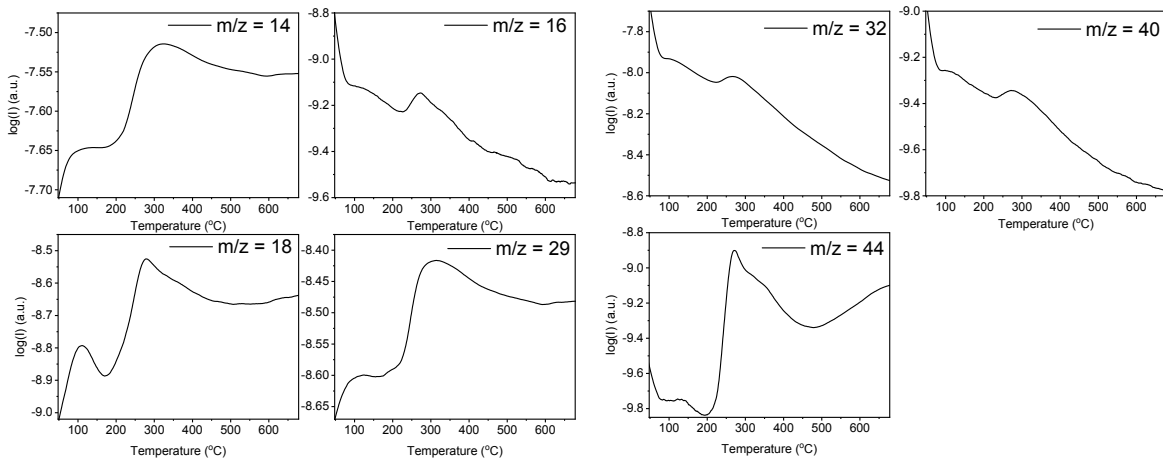

Figure S15. TGA-MS of F/bet:LA NaDES



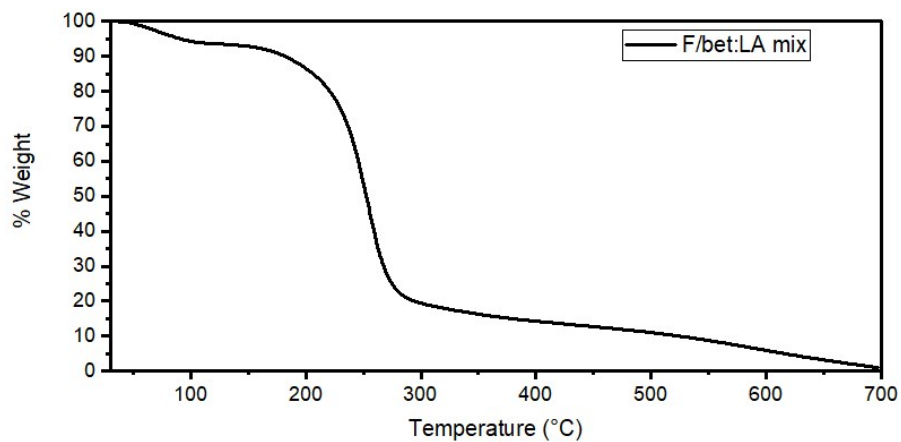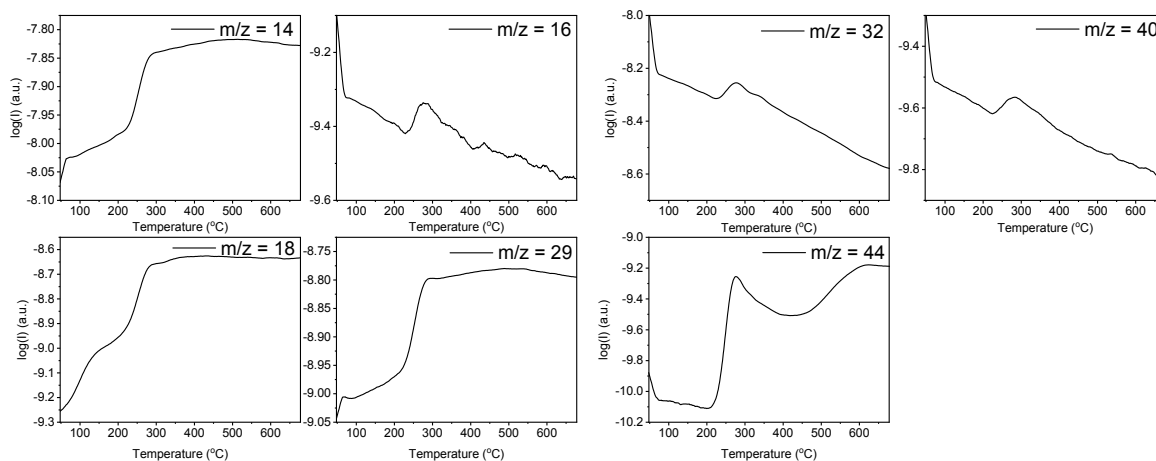

Figure S16. TGA/MS of F/bet:LA mix

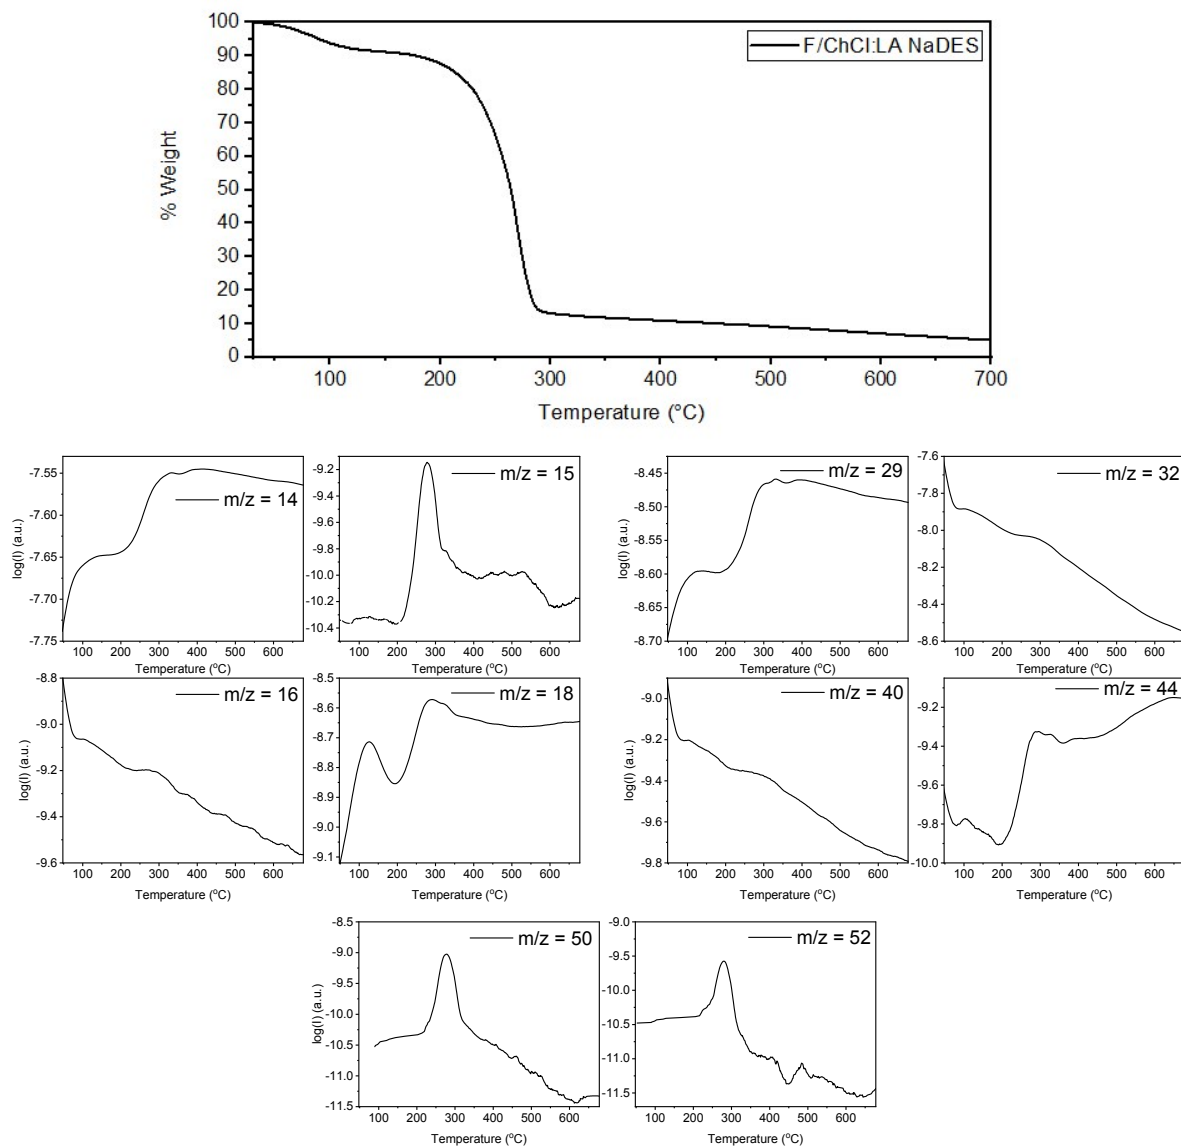

Figure S17. TGA-MS of F/ChCl:LA NaDES

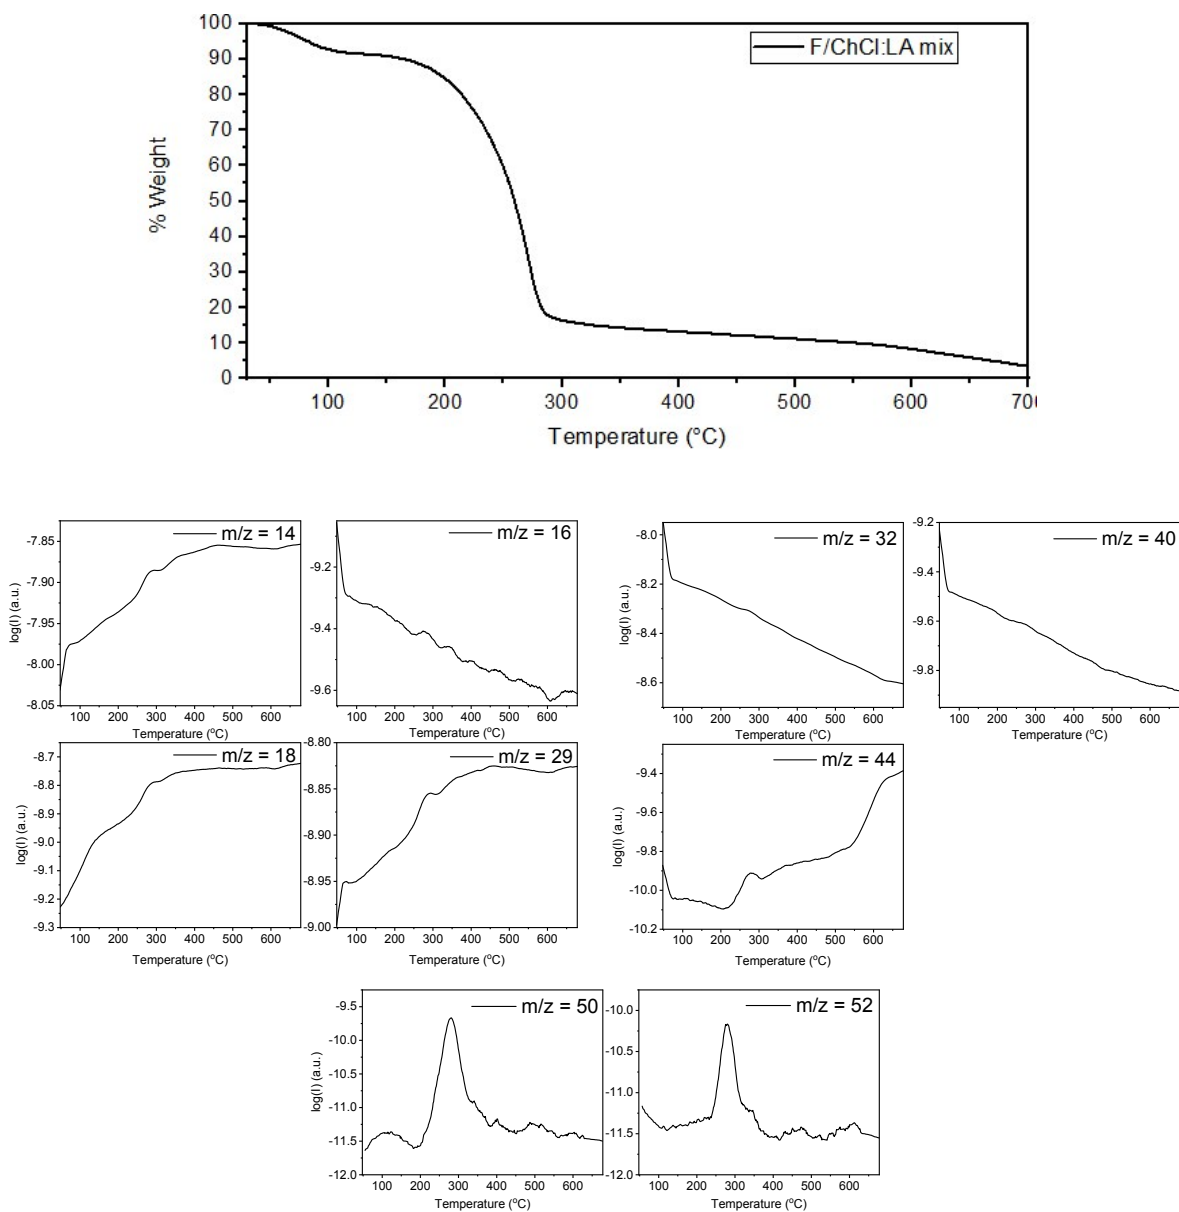

Figure S18. TGA-MS of F/ChCl:LA mix

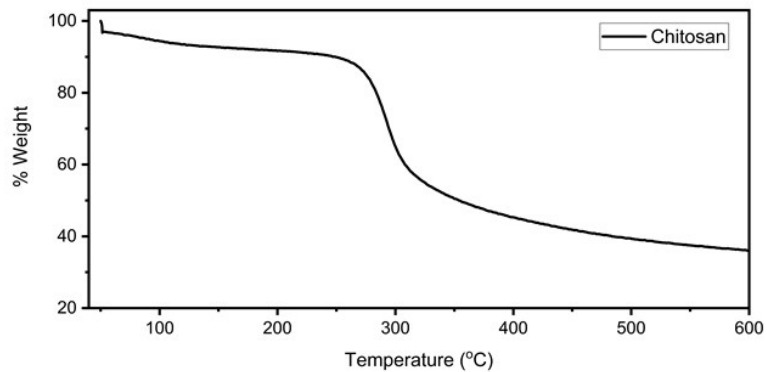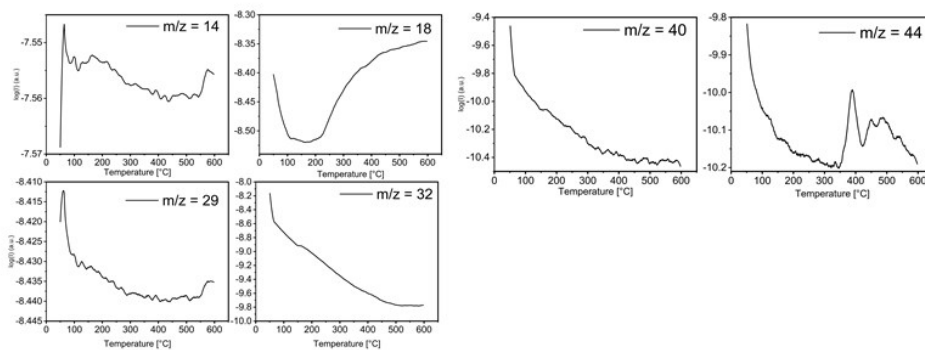

Figure S19. TGA-MS of chitosan

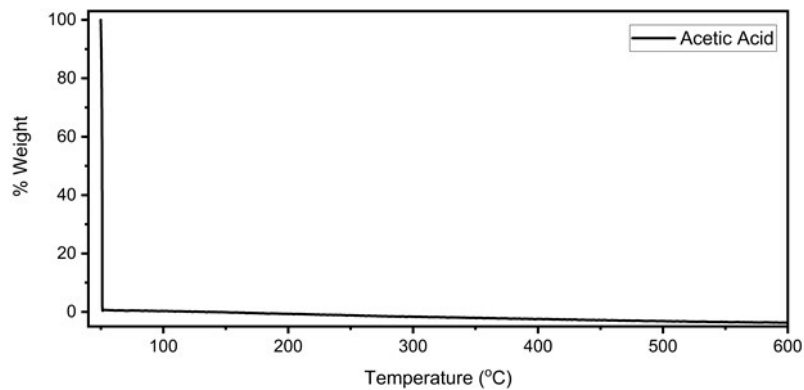

Figure S20. TGA of acetic acid.

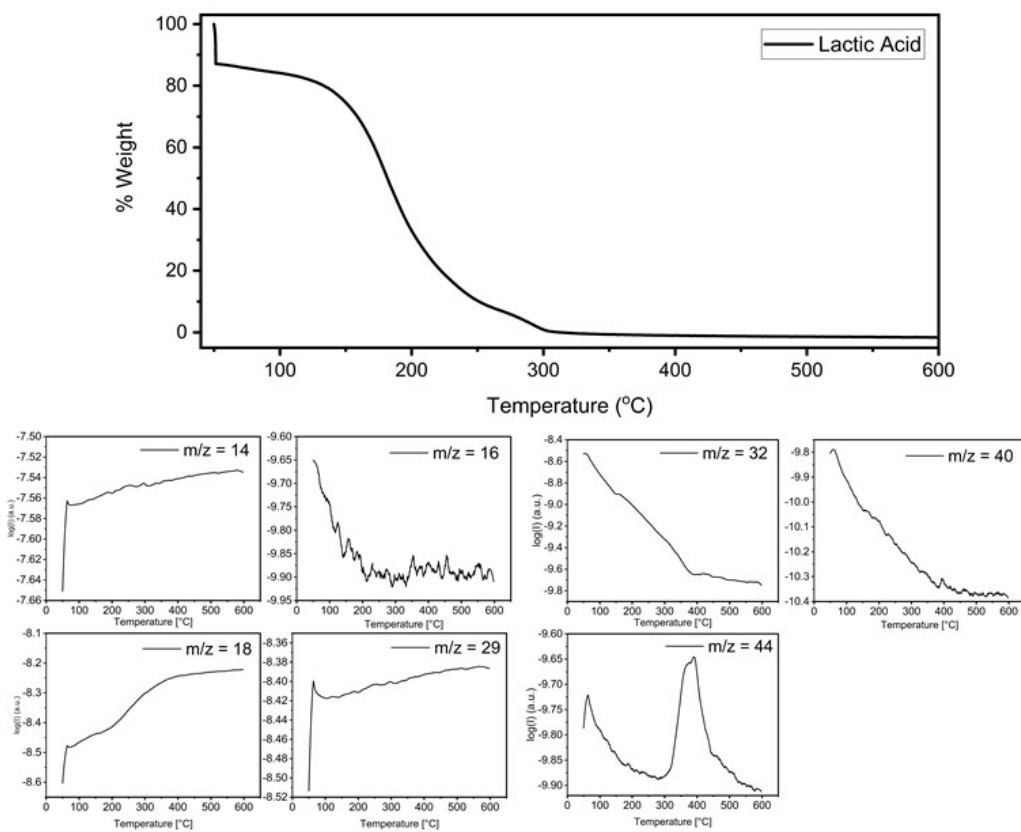

Figure S21. TGA-MS of lactic acid.

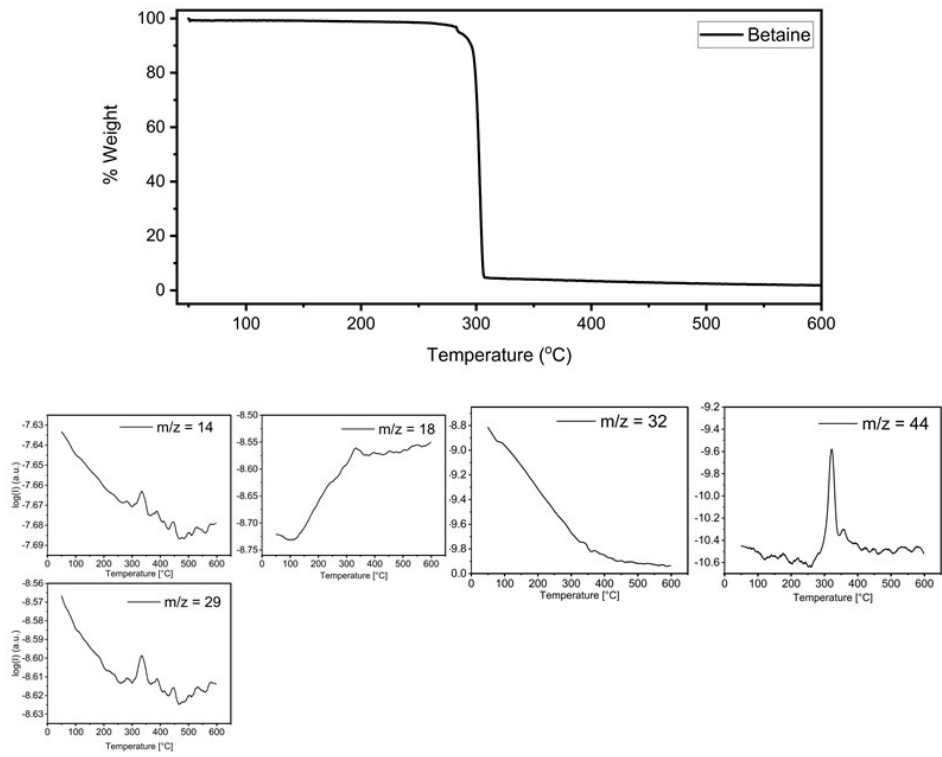

Figure S22. TGA-MS of betaine.

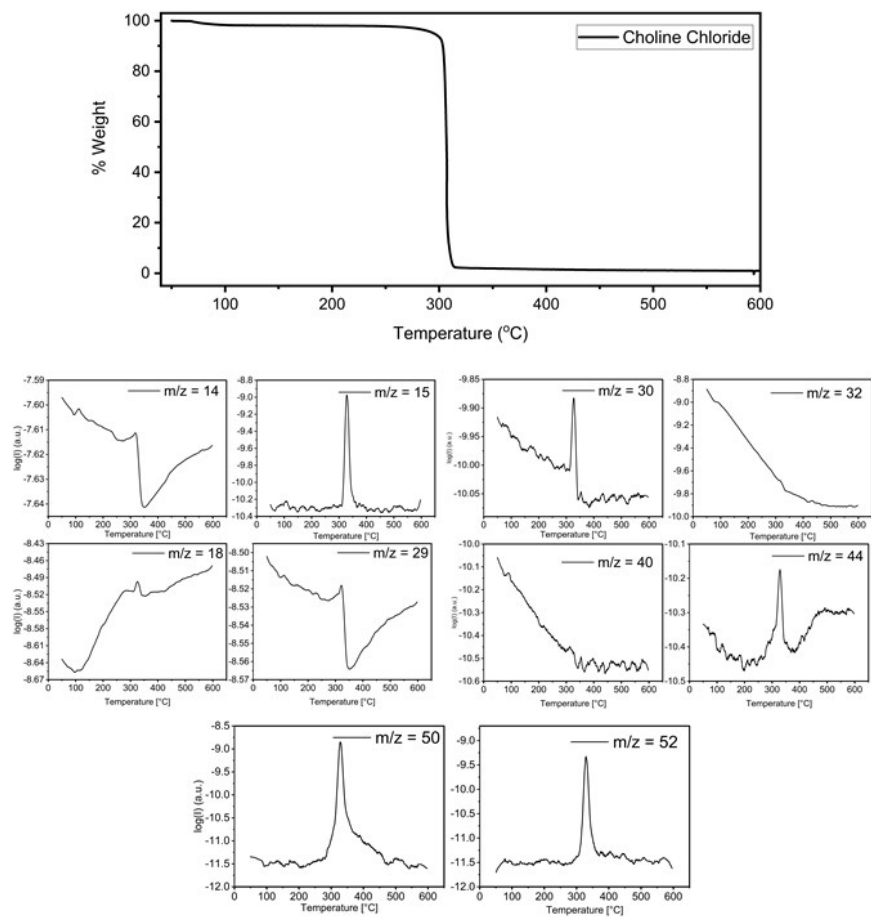

Figure S23. TGA-MS of choline chloride.
